# Supplementary material for: SnO2(β-Bi2O3)/Bi2Sn2O7 nanohybrids doped with Pt and Pd nanoparticles: applications in visible light photocatalysis, electrical conductivity and dye-sensitized solar cells
Source: Royal Society of Chemistry journal article supplement (doi:10.1039/c5cp02066b), 2015-01-01

**SnO<sub>2</sub>(β-Bi<sub>2</sub>O<sub>3</sub>)/Bi<sub>2</sub>Sn<sub>2</sub>O<sub>7</sub> Nanohybrids Doped Pt and Pd Nanoparticles: Applications in Visible-Light Photocatalysis, Electrical Conductivity and Dye-sensitized Solar Cells**

Mohamed Khairy, Mohamed Mokhtar Mohamed

Benha University, Faculty of Science, Chemistry Department, Benha, Egypt

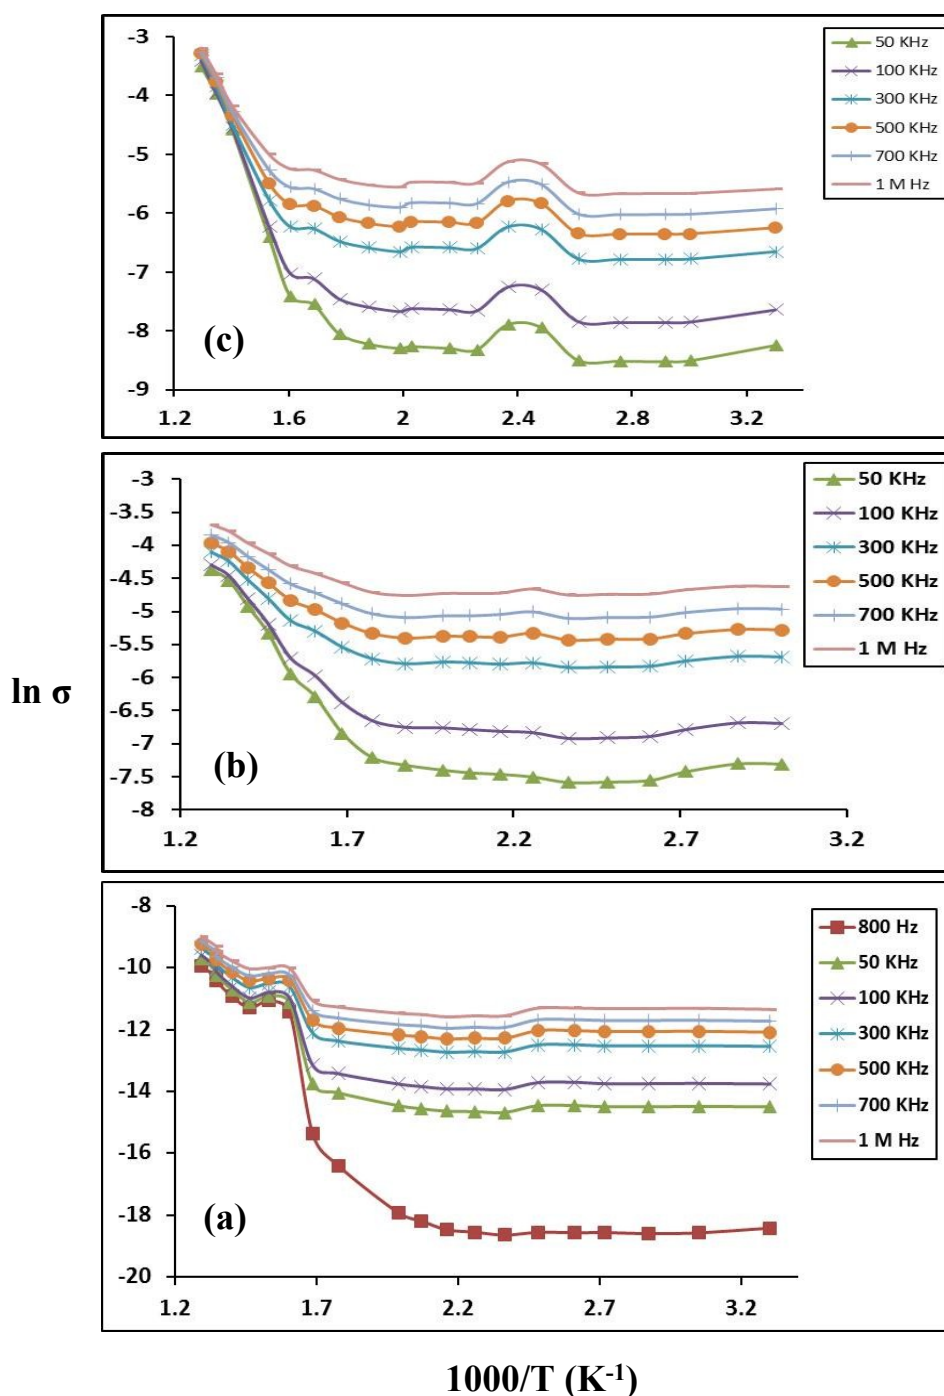

**Fig. S1: Temperature dependence of Ac-conductivity of: a)SnBi b)Pd/SnBi c)Pt/SnBi**

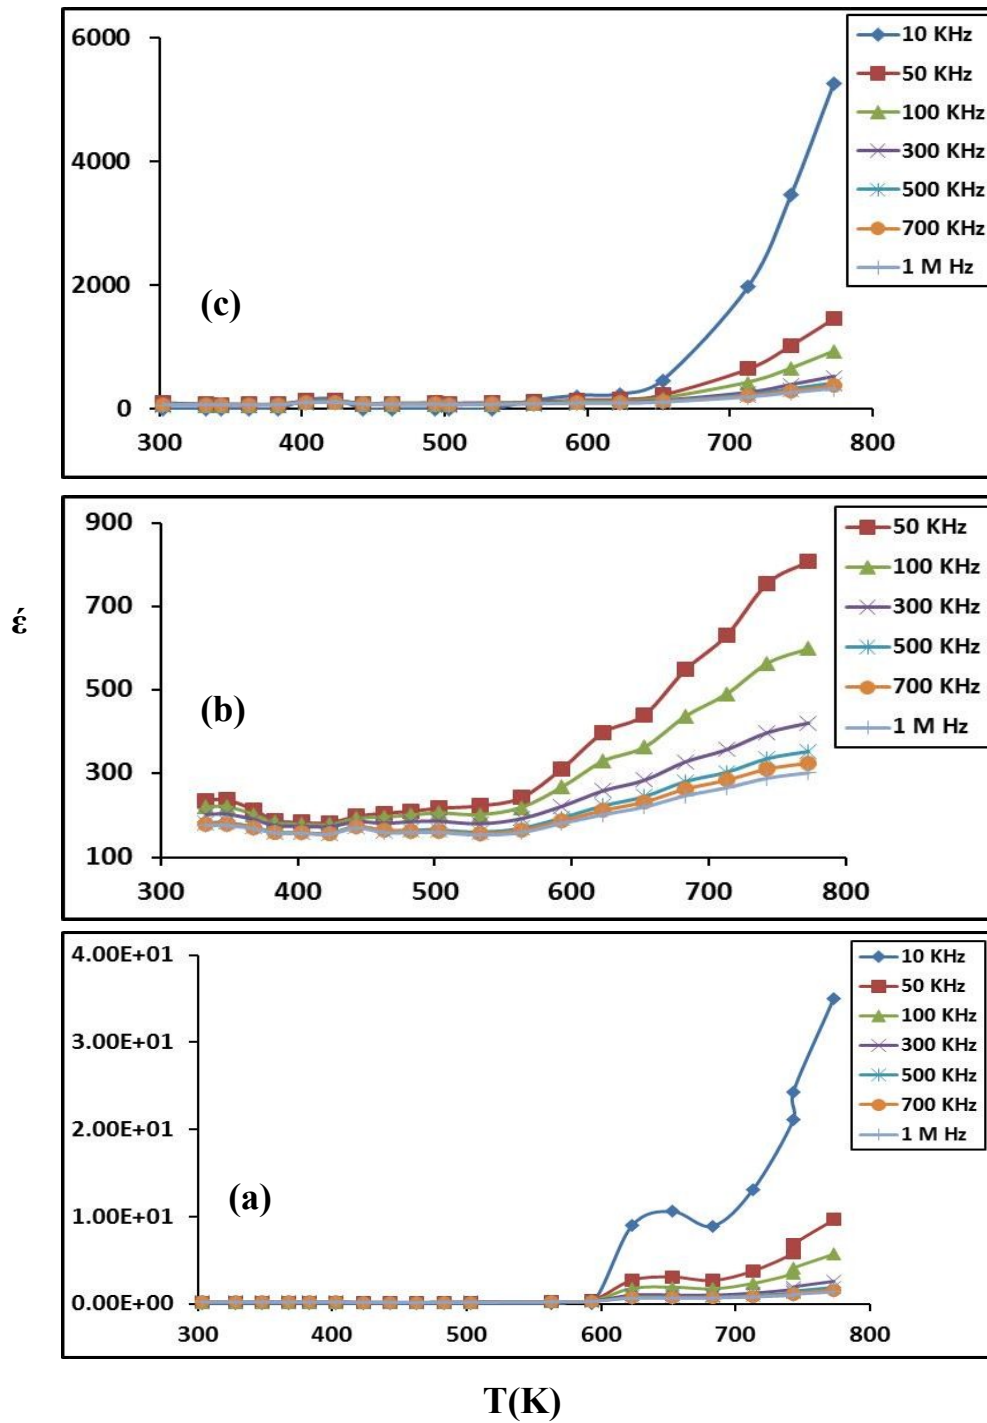

**Fig. S2: Temperature dependence of dielectric constant of:**  
a)SnBi b)Pd/SnBi c)Pt/SnBi

**Figure S3:**

The IPCE plot as a function of the wavelength for Pd/SnBi<sub>3</sub>, Pt/SnBi<sub>3</sub> and SnBi<sub>3</sub>

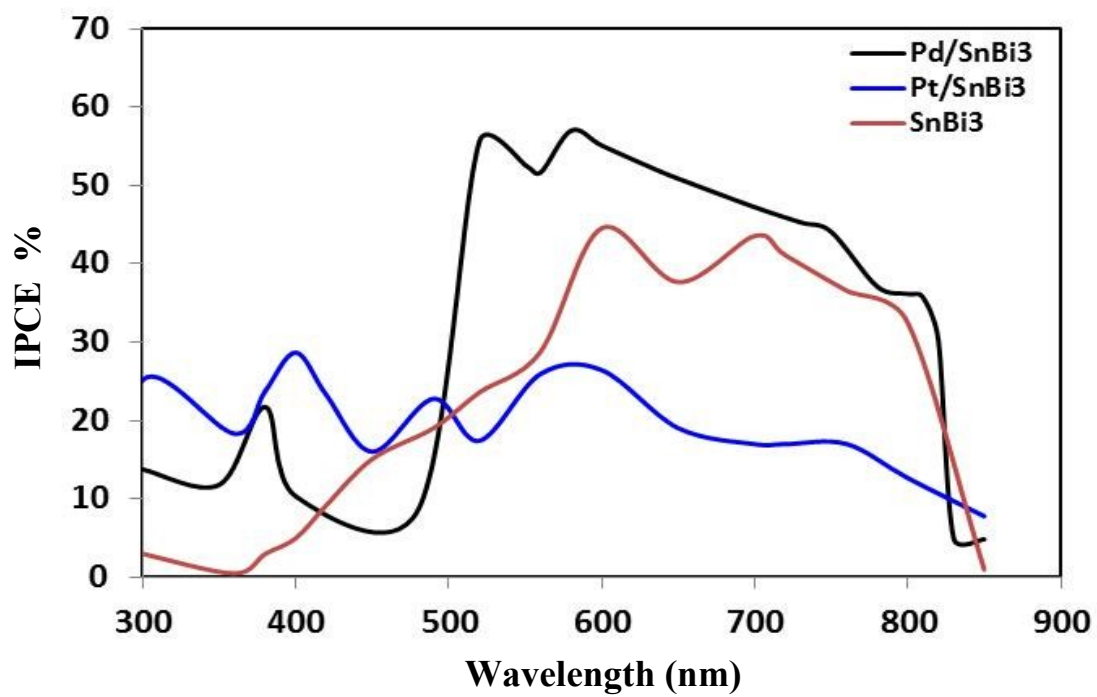

Supplement: c5cp02066b1.pdf [file c5cp02066b1.pdf]
